# Supplementary material for: The Application of Quantitative Metabolomics for the Taxonomic Differentiation of Birds
Source: MDPI journal article supplement (doi:10.3390/biology11071089), 2022-07-21
Supplement: s1 [file s1]

# Supplementary information

for

## Application of quantitative metabolomics for taxonomic differentiation of birds

by

Ekaterina A. Zelentsova<sup>1</sup>, Lyudmila V. Yanshole<sup>1</sup>, Yuri P. Tsentalovich<sup>1</sup>, Kirill A. Sharshov<sup>2</sup>, and Vadim. V. Yanshole<sup>1,\*</sup>

<sup>1</sup> *Laboratory of Proteomics and Metabolomics, International Tomography Center SB RAS, Institutskaya 3a, Novosibirsk, 630090, Russia*

<sup>2</sup> *Laboratory of Molecular Epidemiology and Biodiversity of Viruses, Federal Research Center of Fundamental and Translational Medicine, Timakova str. 2, Novosibirsk, 630117, Russia*

\* Corresponding author. E-mail address: [vadim.yanshole@tomo.nsc.ru](mailto:vadim.yanshole@tomo.nsc.ru)

Contents:

**Supplementary Figure S1. Representative <sup>1</sup>H NMR spectrum of bird lens metabolome.**

**Supplementary Figure S2. PCA scores plots for non-scaled (left panel) and Pareto-scaled (right panel) data.**

**Supplementary Figure S3. HCA clustering results.**

**Supplementary Figure S4. HCA dendrograms obtained for non-scaled (left panel, NSS) or Pareto-scaled (right panel, PSS) data.**

**Supplementary Figure S5. Clustering result shown as heatmap.**

**Supplementary Table S2. Average concentrations of metabolites in 14 bird species in nmol/g, color-coded.**

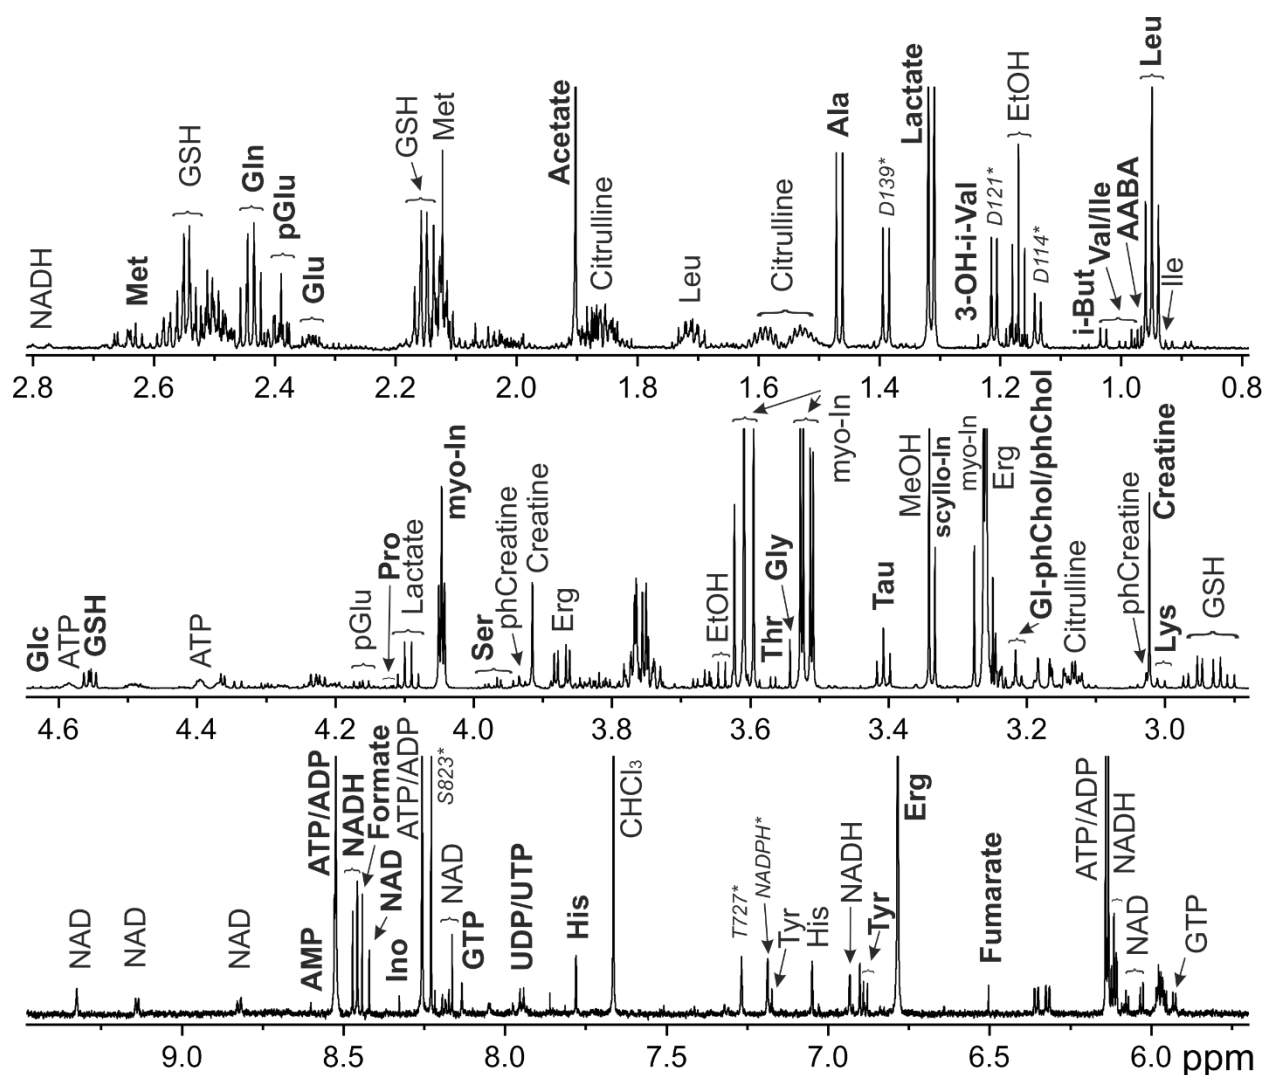

**Supplementary Figure S1. Representative  $^1\text{H}$  NMR spectrum of bird lens metabolome.**

Obtained for *P. cristatus* lens. The signals used for metabolite quantification are shown in bold.

Abbreviations: 3-OH-i-Val – 3-hydroxyisovalerate, AABA – 2-aminobutyrate, ADP – adenosine diphosphate, AMP – adenosine monophosphate, ATP – adenosine triphosphate,  $\text{CHCl}_3$  – chloroform, Erg – ergothioneine, EtOH – ethanol, Glc – glucose, Gl-phChol – glycerol-3-phosphocholine, GSH – glutathione reduced, GTP – guanosine triphosphate, i-But – isobutyrate, Ino – inosine, MeOH – methanol, myo-In – myo-inositol, NAD – nicotinamide adenine dinucleotide, NADH – nicotinamide adenine dinucleotide reduced, NADPH – nicotinamide adenine dinucleotide phosphate reduced, pGlu – pyroglutamate, phChol – O-phosphocholine, phCreatine – phosphocreatine, scyllo-In – scyllo-inositol, Tau – taurine, UDP – uridine diphosphate, UTP – uridine triphosphate. For amino acids, standard tree letter code is used.

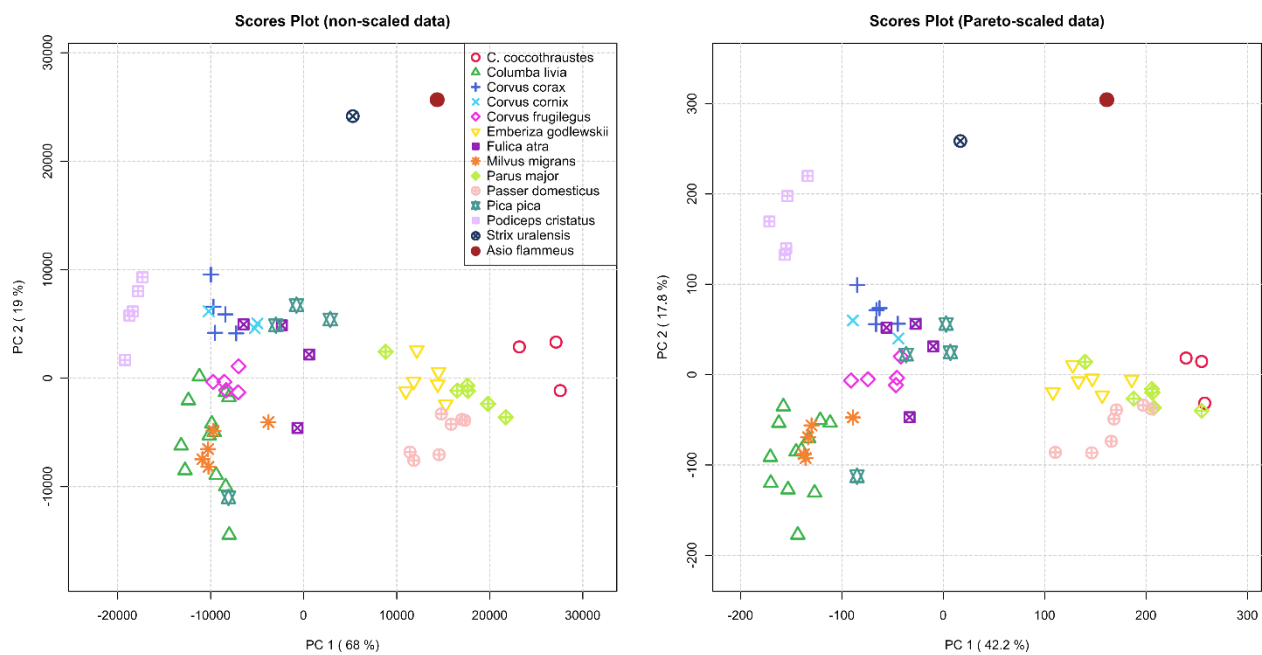

**Supplementary Figure S2. PCA scores plots for non-scaled (left panel) and Pareto-scaled (right panel) data.**

Non-scaled data

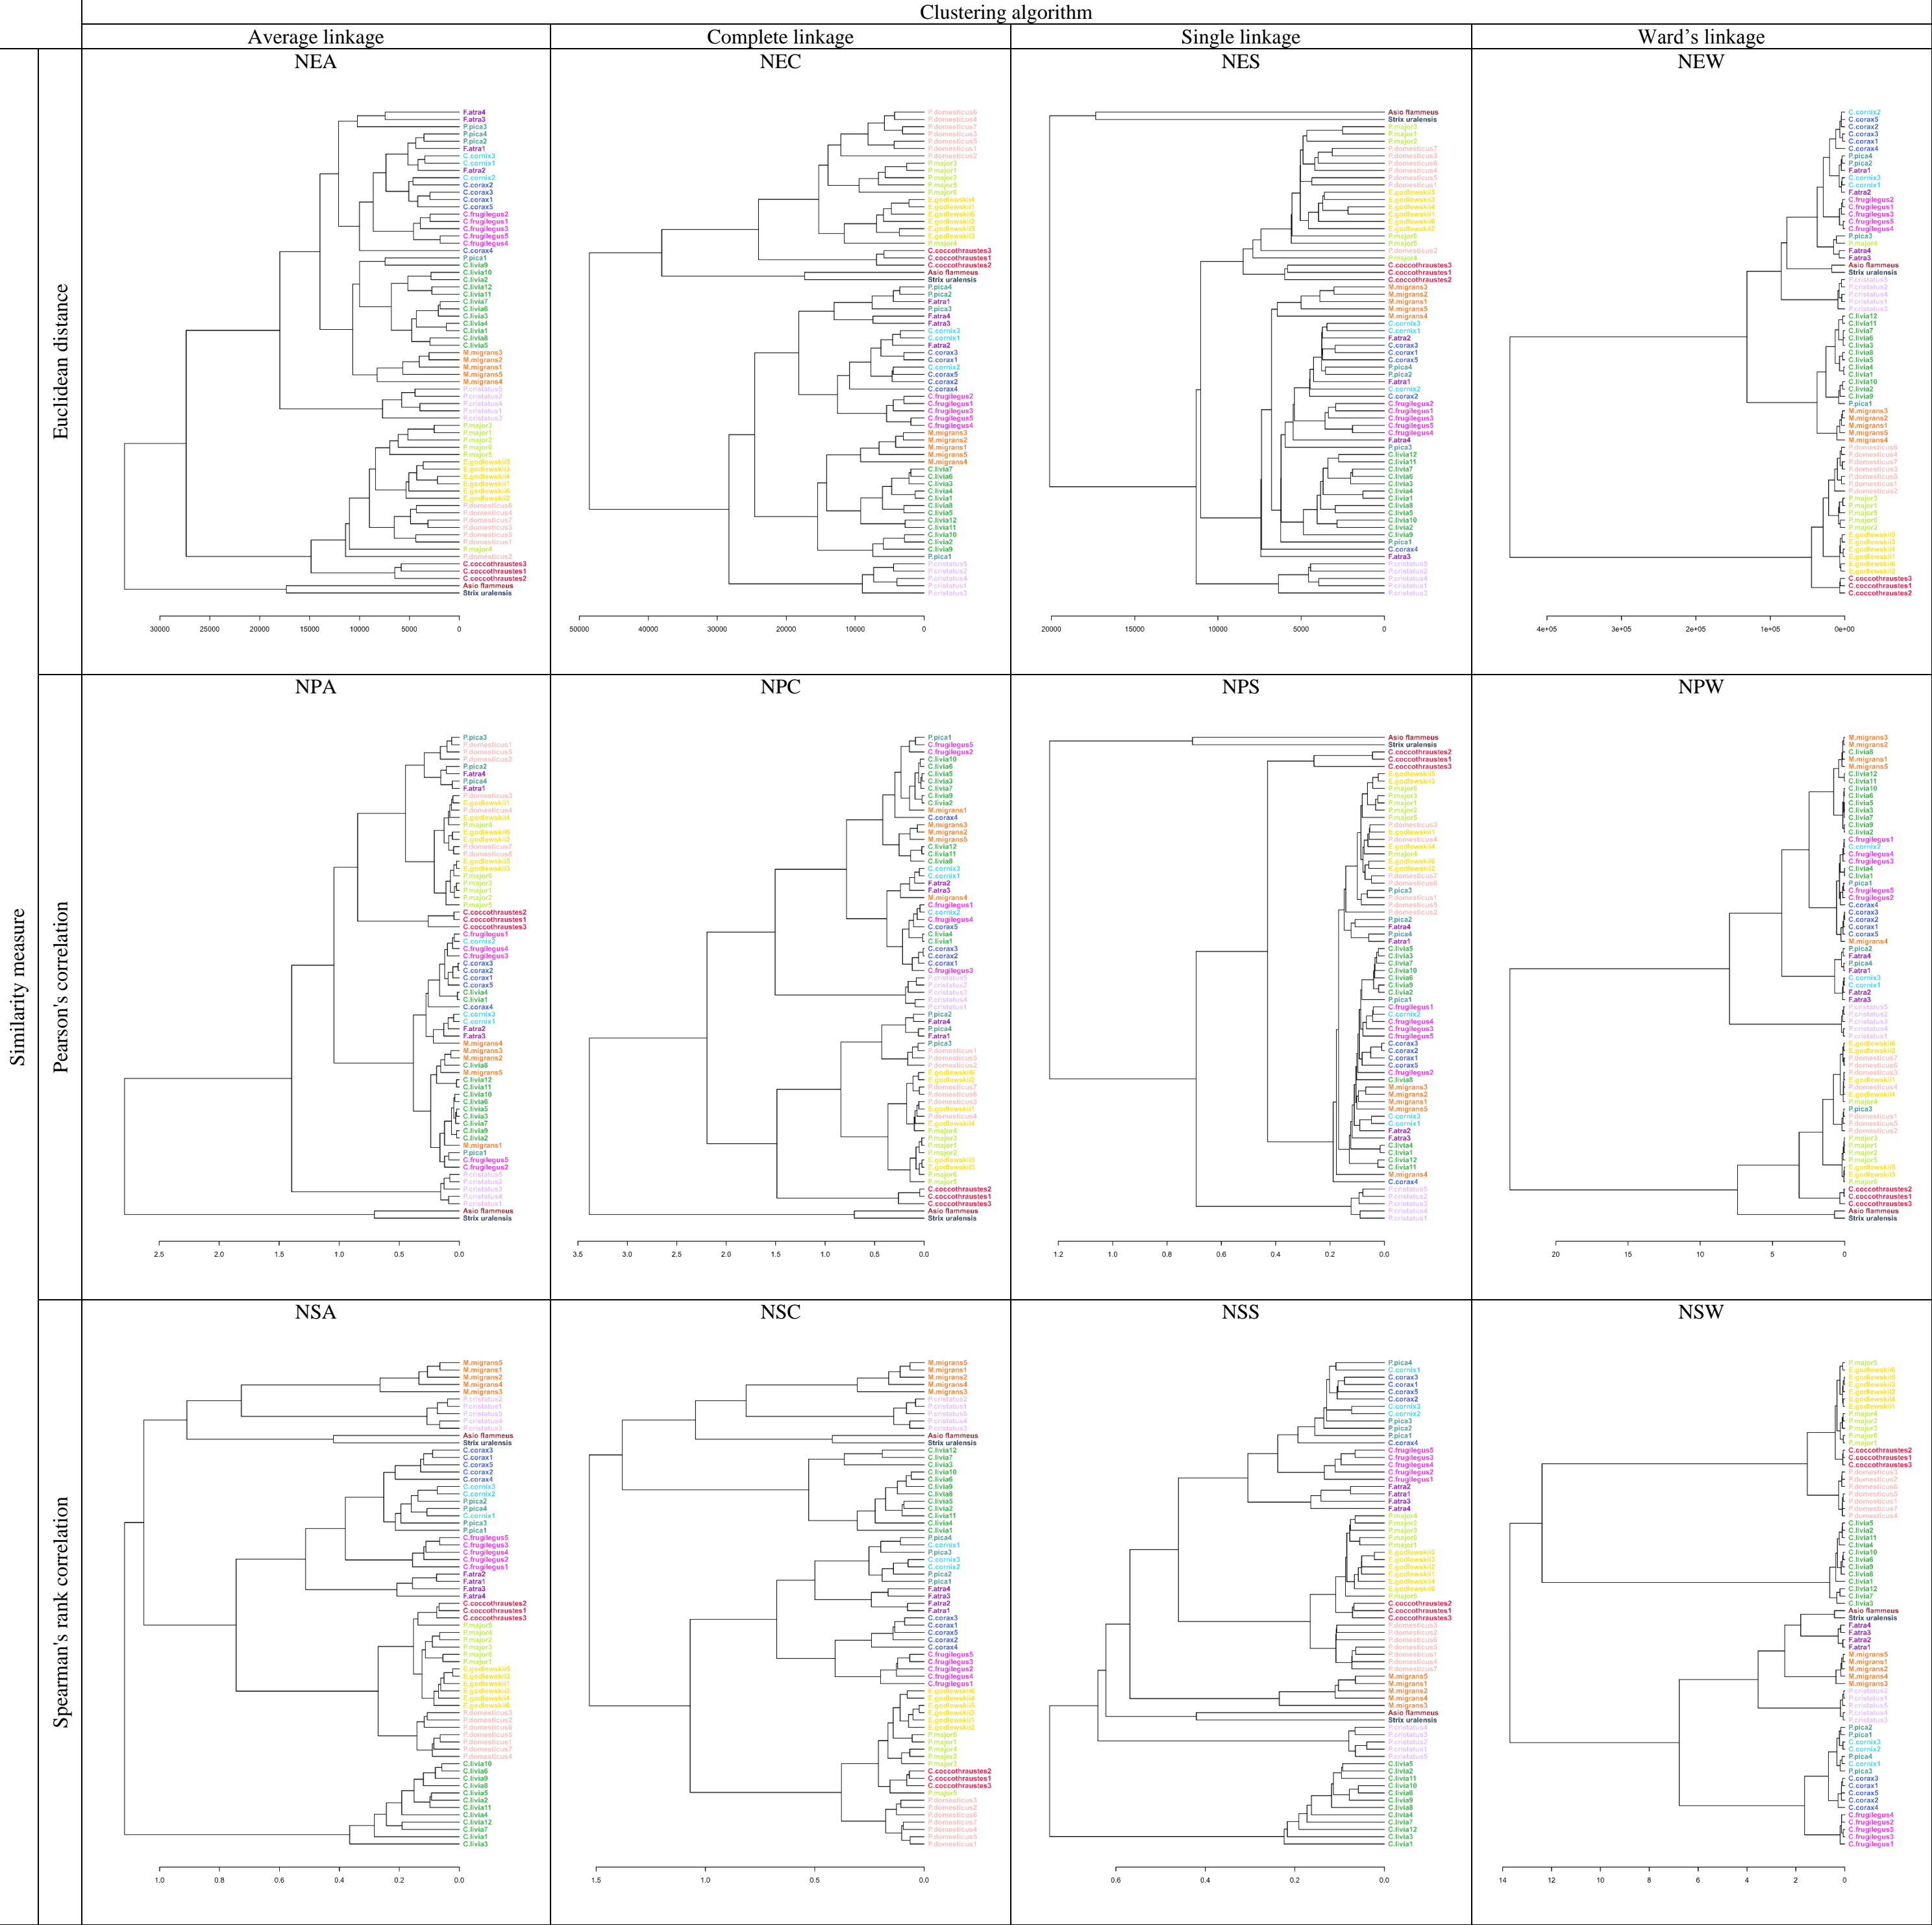

Pareto-scaled data

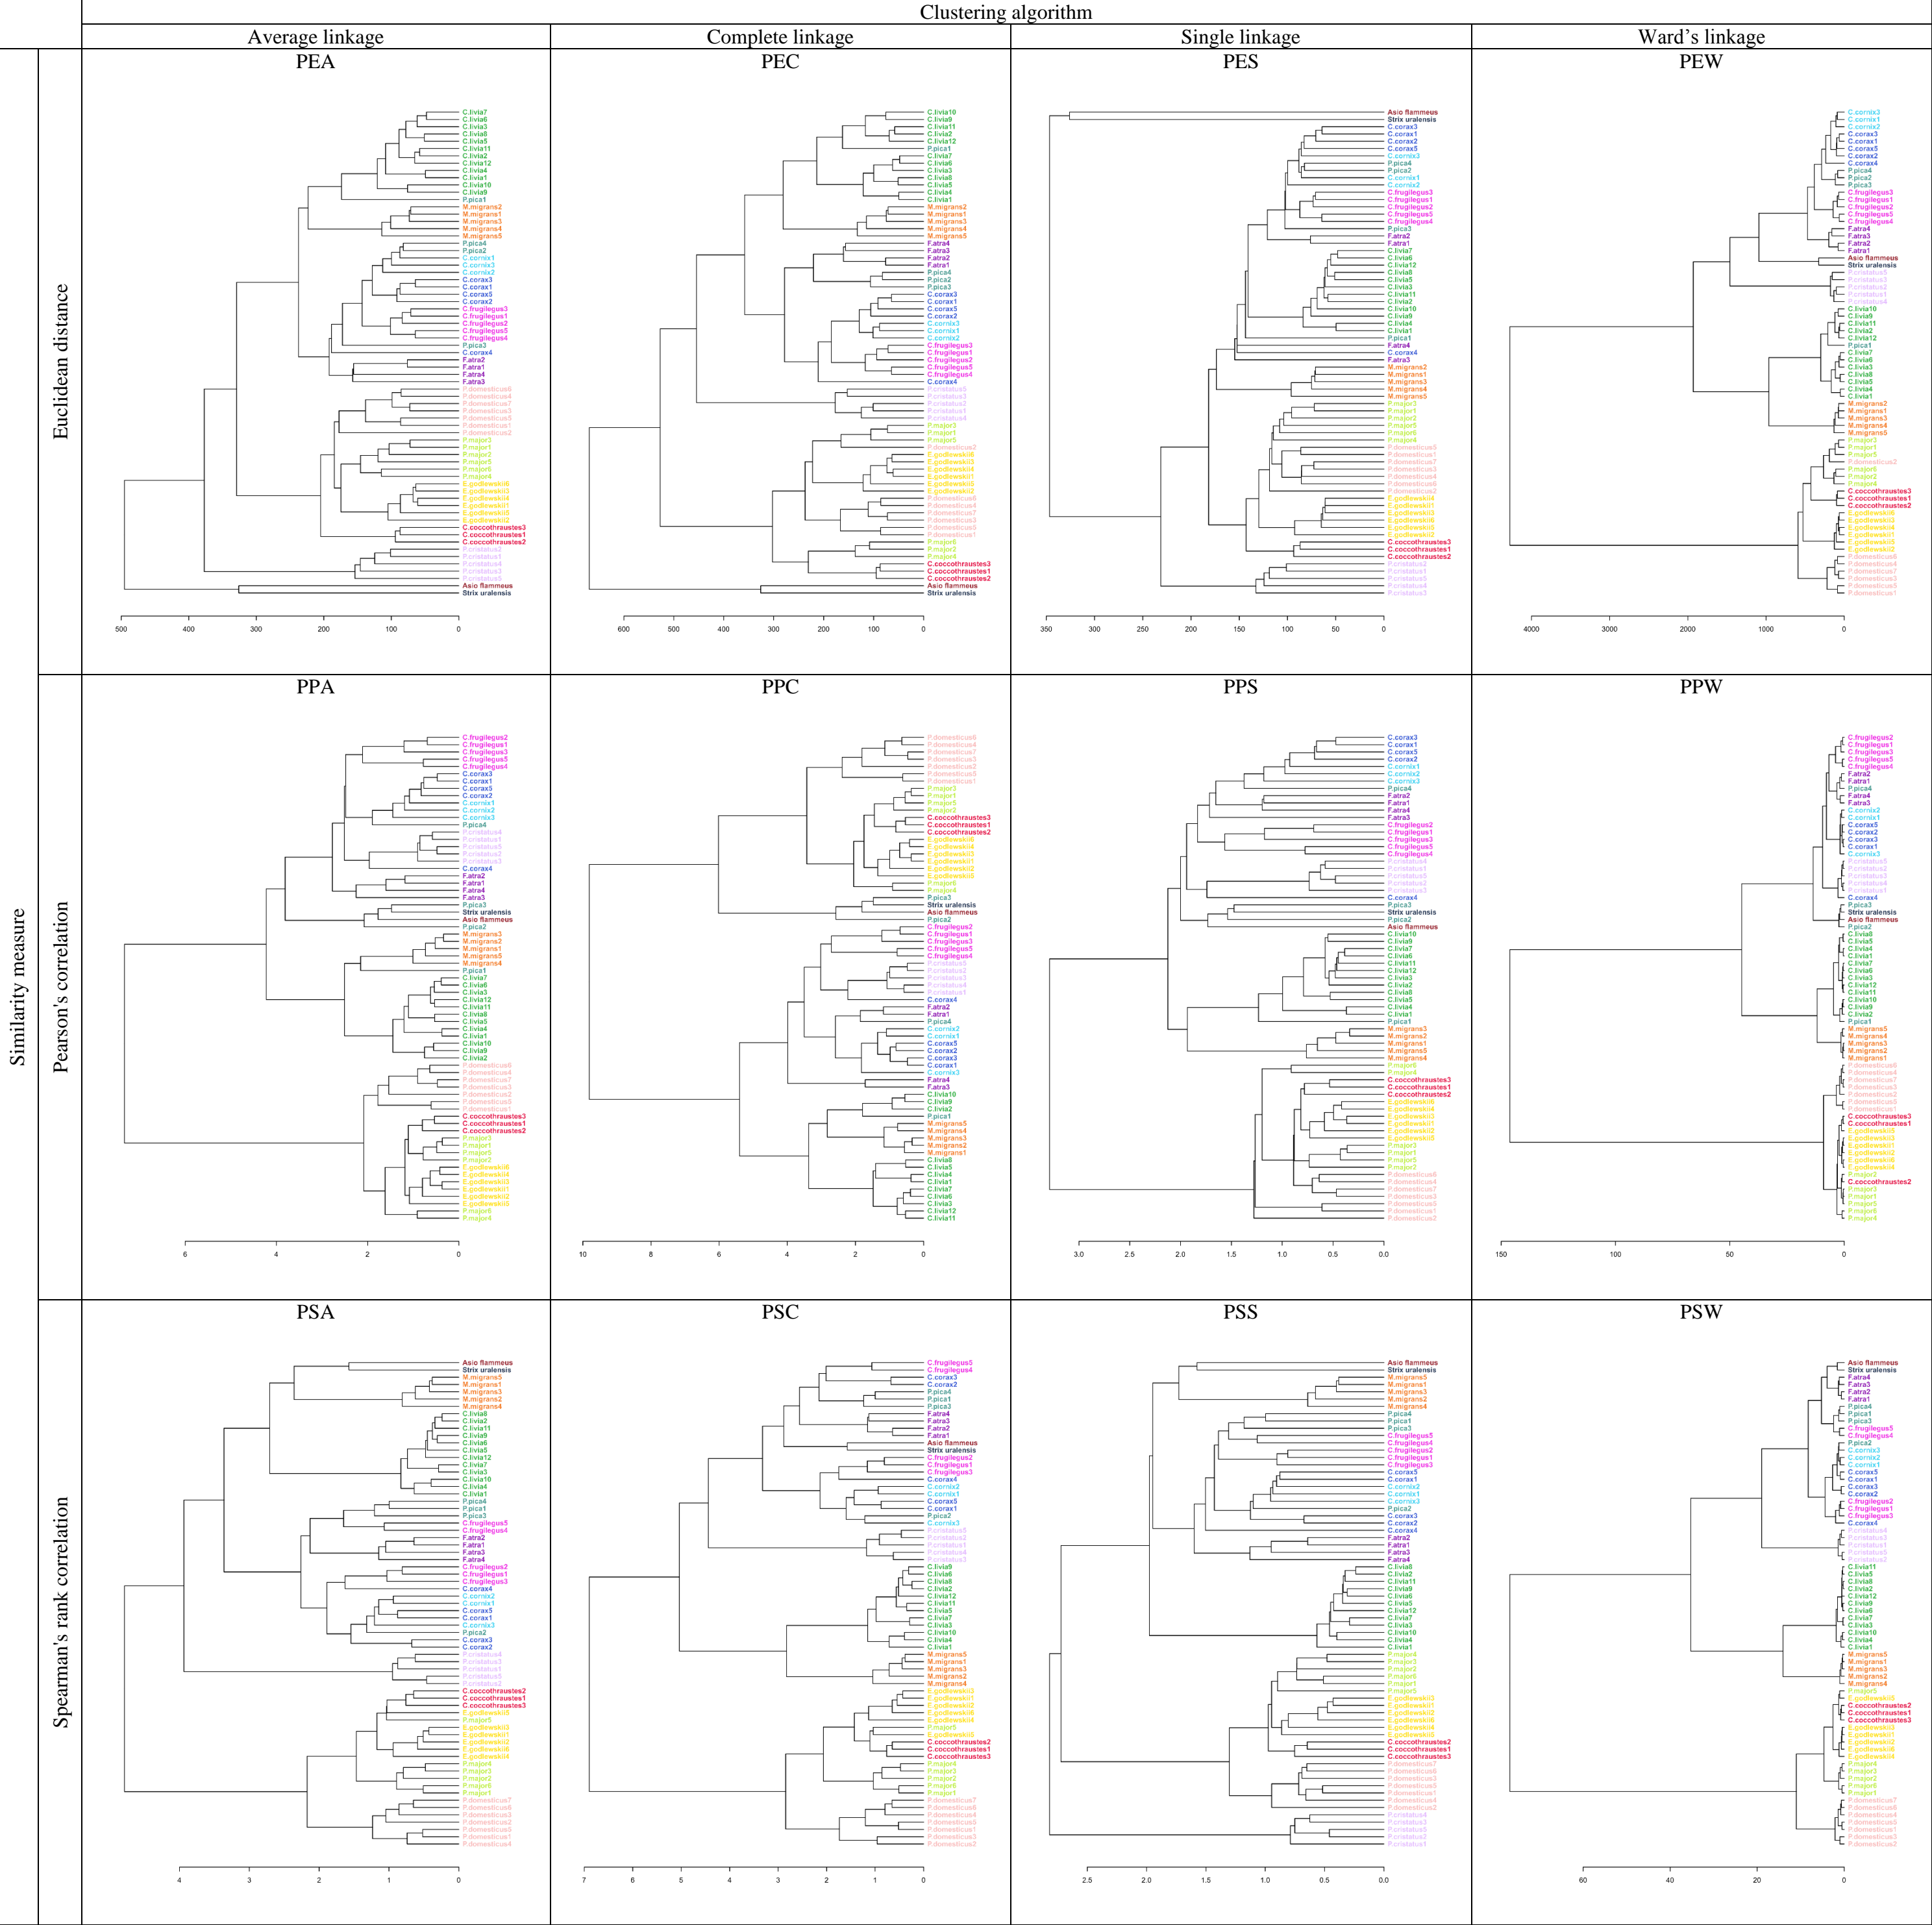

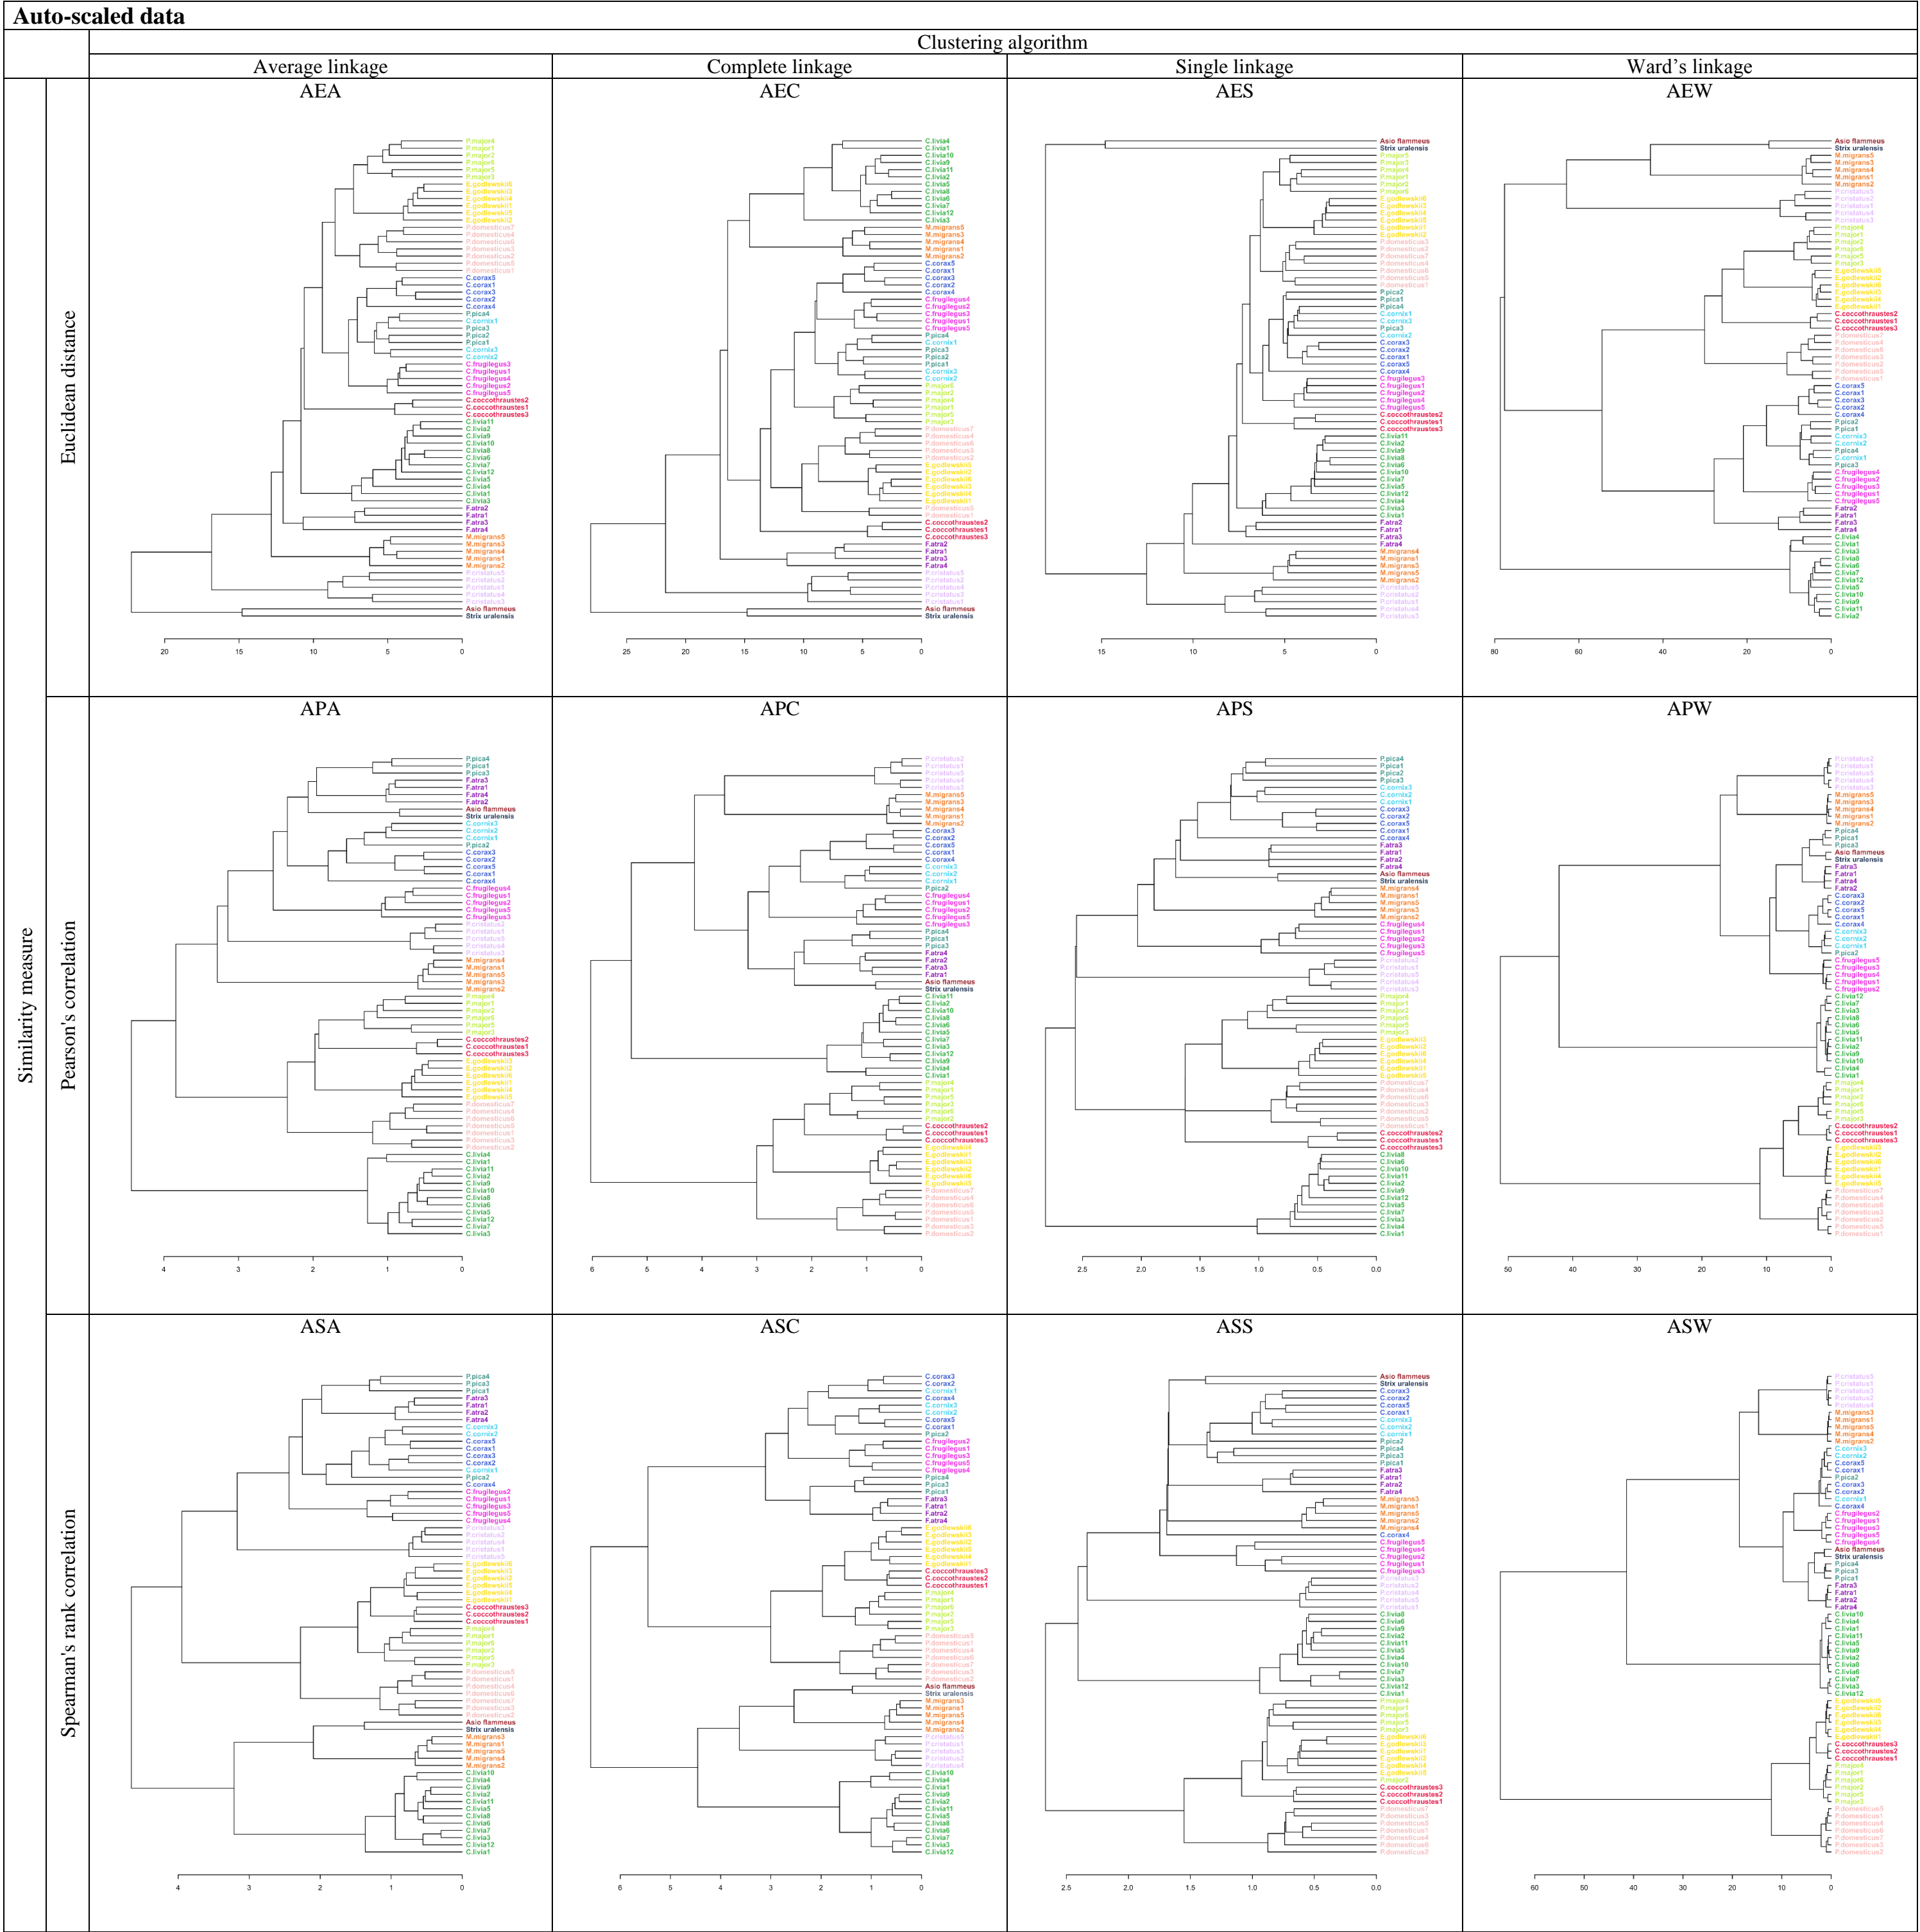

Supplementary Figure S3. HCA clustering results for all 36 possible combinations of data scalings, similarity measures and clustering algorithms, available in MetaboAnalyst web-platform.



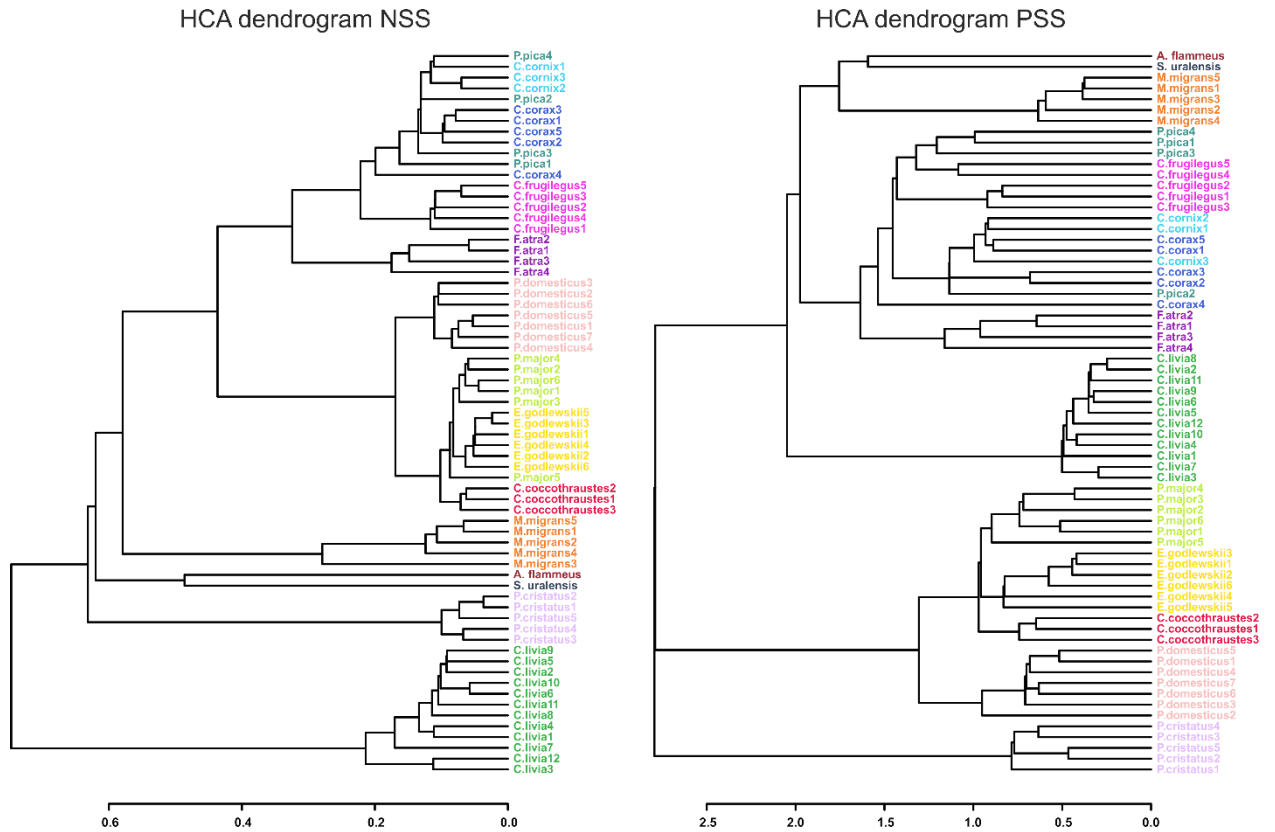

**Supplementary Figure S4. HCA dendrograms obtained for non-scaled (left panel, NSS) or Pareto-scaled (right panel, PSS) data.** Plotted with the Spearman's rank correlation similarity measure and use of Single linkage clustering algorithm (clustering uses the closest pair of observations).

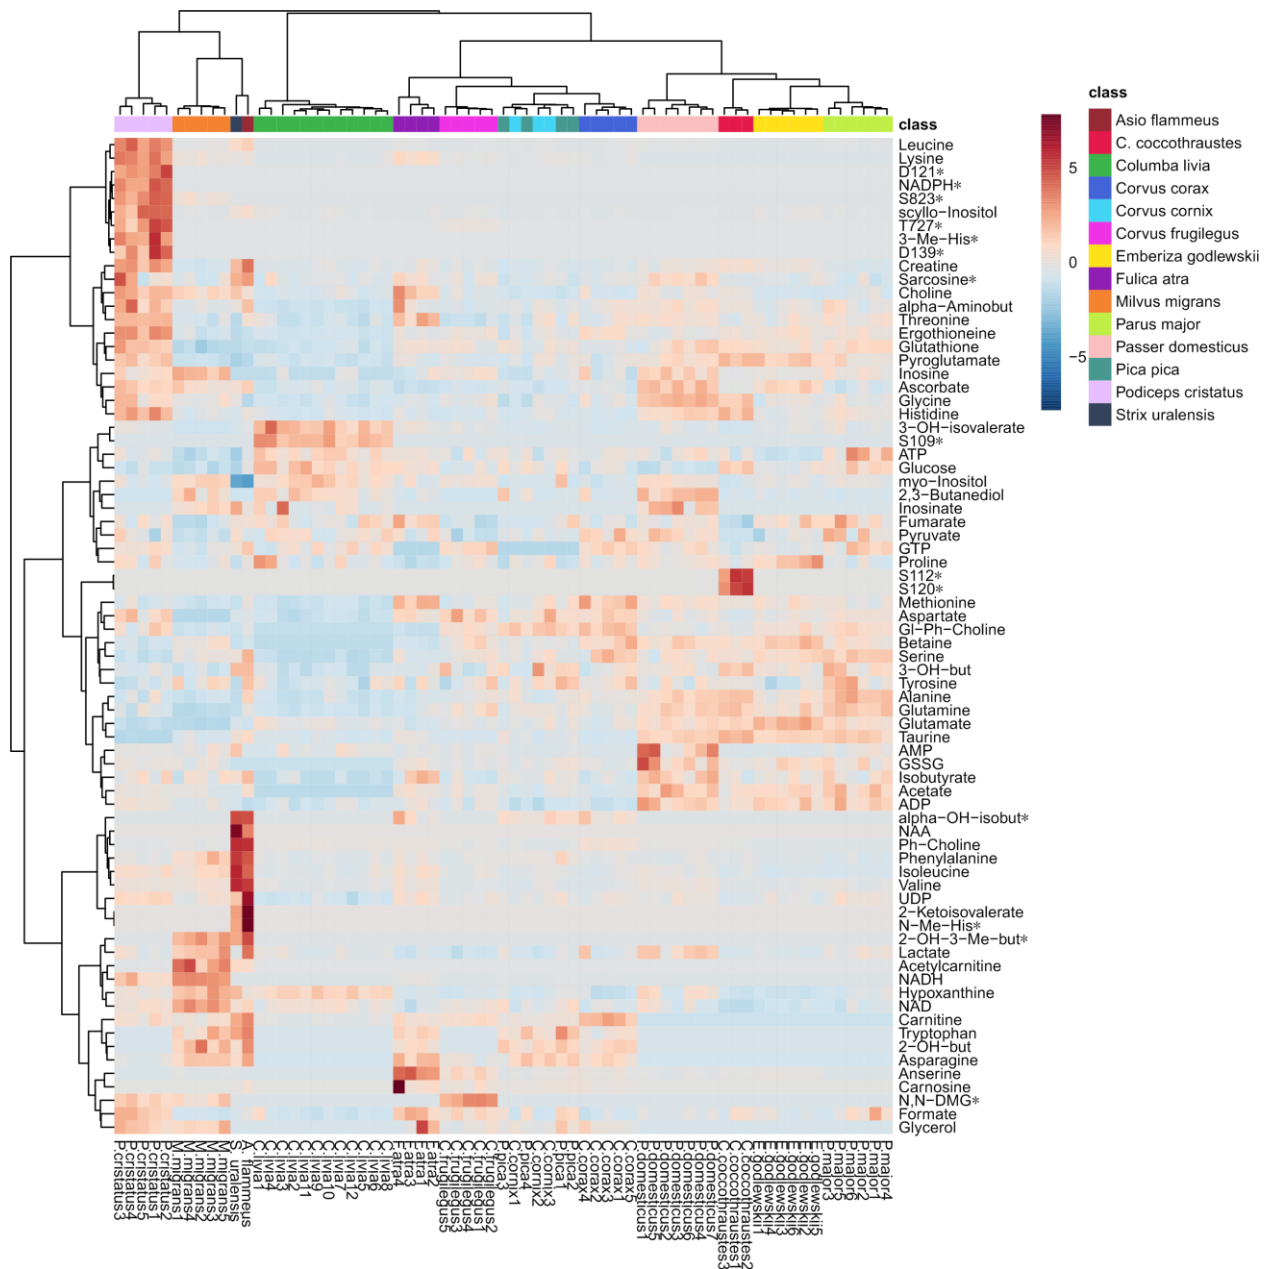

**Supplementary Figure S5. Clustering result shown as heatmap.** HCA is performed for both – metabolites and samples (Euclidean distance measure, and clustering algorithm using Ward’s linkage)



Supplementary Table S2. Sorted average concentrations of metabolites in 14 bird species in nmol/g, color-coded.

Legend for concentration values coloring:

|       |                             |      |                            |
|-------|-----------------------------|------|----------------------------|
| 20000 | [C] > 10.000 nmol/g         | 1500 | 3.000 > [C] > 1.000 nmol/g |
| 5000  | 10.000 > [C] > 3.000 nmol/g | 500  | <1000 nmol/g               |

| \ Species<br>Metabolite       | Black kite        | Eurasian magpie | Northern raven  | Eurasian coot  | Godlewski's bunting  | Great crested grebe | Great tit       | Hawfinch                 | Hooded crow      | House sparrow        | Rock dove       | Rook                 | Short-eared owl <sup>a</sup> | Ural owl <sup>a</sup> | Average |
|-------------------------------|-------------------|-----------------|-----------------|----------------|----------------------|---------------------|-----------------|--------------------------|------------------|----------------------|-----------------|----------------------|------------------------------|-----------------------|---------|
|                               | <i>M. migrans</i> | <i>P. pica</i>  | <i>C. corax</i> | <i>F. atra</i> | <i>E. godlewskii</i> | <i>P. cristatus</i> | <i>P. major</i> | <i>C. coccythraustes</i> | <i>C. cornix</i> | <i>P. domesticus</i> | <i>C. livia</i> | <i>C. frugilegus</i> | <i>A. flammeus</i>           | <i>S. uralensis</i>   |         |
| myo -Inositol                 | 37644             | 29142           | 25982           | 28923          | 28984                | 27729               | 29454           | 25127                    | 26315            | 33735                | 37071           | 32297                | 2974                         | 5354                  | 26481   |
| Taurine                       | 14986             | 20099           | 12722           | 20142          | 34987                | 3225                | 37936           | 47662                    | 15029            | 36307                | 14527           | 13989                | 32320                        | 25625                 | 23540   |
| Lactate                       | 13884             | 7065            | 7580            | 5467           | 6415                 | 7719                | 8070            | 6130                     | 5297             | 11539                | 7060            | 4882                 | 20575                        | 6728                  | 8458    |
| Glutamine                     | 1741              | 5755            | 5385            | 4431           | 7814                 | 4609                | 10687           | 10618                    | 6362             | 9249                 | 3229            | 7374                 | 6111                         | 2403                  | 6126    |
| Acetate                       | 4261              | 4252            | 3048            | 6004           | 8072                 | 5069                | 9677            | 6236                     | 3089             | 10392                | 89              | 4887                 | 7166                         | 3117                  | 5383    |
| Glutathione                   | 1187              | 3529            | 2940            | 3880           | 3972                 | 5993                | 4703            | 4643                     | 3574             | 4379                 | 2143            | 3638                 | 1841                         | 1397                  | 3416    |
| Alanine                       | 1709              | 3027            | 3219            | 2106           | 3641                 | 2371                | 6012            | 5664                     | 2637             | 4672                 | 1705            | 2916                 | 4919                         | 1160                  | 3268    |
| Ergothioneine                 | 1863              | 1887            | 4486            | 2982           | 4122                 | 9107                | 3760            | 3721                     | 3239             | 2904                 | 1579            | 3561                 | 1021                         | 361                   | 3185    |
| Serine                        | 2669              | 2214            | 4352            | 2187           | 3853                 | 1192                | 4573            | 3125                     | 3209             | 2950                 | 904             | 2846                 | 5582                         | 2915                  | 3041    |
| ATP <sup>b</sup>              | 2241              | 3307            | 3154            | 3327           | 2381                 | 3071                | 4459            | 3072                     | 2737             | 3241                 | 3848            | 3078                 | 2900                         | 1563                  | 3027    |
| Glutamate                     | 788               | 1805            | 1858            | 1580           | 3866                 | 1022                | 2677            | 2985                     | 2126             | 2777                 | 2020            | 1890                 | 1326                         | 1625                  | 2025    |
| Creatine                      | 579               | 629             | 751             | 1010           | 1095                 | 2752                | 727             | 1416                     | 778              | 1077                 | 811             | 828                  | 3560                         | 2294                  | 1308    |
| Pyroglutamate                 | 564               | 801             | 916             | 917            | 1682                 | 1706                | 1222            | 1896                     | 1100             | 1328                 | 651             | 842                  | 343                          | 174                   | 1010    |
| Glucose                       | 270               | 1402            | 819             | 1389           | 966                  | 499                 | 1570            | 1916                     | 949              | 445                  | 1783            | 796                  | 958                          | 0                     | 983     |
| Ph-Choline                    | 170               | 89              | 548             | 339            | 69                   | 114                 | 64              | 167                      | 96               | 215                  | 246             | 203                  | 3918                         | 3946                  | 727     |
| ADP                           | 558               | 428             | 381             | 627            | 964                  | 718                 | 998             | 745                      | 298              | 1090                 | 466             | 563                  | 287                          | 470                   | 614     |
| Glycine                       | 584               | 312             | 533             | 437            | 533                  | 896                 | 549             | 950                      | 472              | 1119                 | 350             | 543                  | 153                          | 555                   | 570     |
| Proline                       | 477               | 324             | 596             | 263            | 1045                 | 683                 | 475             | 575                      | 692              | 669                  | 647             | 563                  | 616                          | 278                   | 565     |
| Betaine                       | 591               | 378             | 896             | 205            | 1027                 | 226                 | 642             | 720                      | 465              | 804                  | 0               | 647                  | 232                          | 106                   | 496     |
| Methionine                    | 225               | 429             | 963             | 1005           | 593                  | 347                 | 467             | 498                      | 547              | 607                  | 196             | 377                  | 481                          | 167                   | 493     |
| Threonine                     | 300               | 304             | 425             | 818            | 439                  | 860                 | 505             | 374                      | 478              | 539                  | 261             | 224                  | 540                          | 123                   | 442     |
| UDP                           | 330               | 311             | 296             | 414            | 264                  | 487                 | 343             | 205                      | 266              | 306                  | 147             | 275                  | 1551                         | 592                   | 413     |
| Leucine                       | 191               | 105             | 142             | 164            | 98                   | 2175                | 134             | 104                      | 164              | 165                  | 85              | 116                  | 954                          | 741                   | 381     |
| Anserine                      | 122               | 220             | 285             | 2449           | 262                  | 0                   | 73              | 203                      | 242              | 150                  | 0               | 746                  | 28                           | 131                   | 351     |
| GSSG                          | 332               | 398             | 284             | 377            | 556                  | 352                 | 505             | 349                      | 256              | 940                  | 0               | 280                  | 0                            | 0                     | 331     |
| Ascorbate                     | 391               | 213             | 234             | 123            | 444                  | 489                 | 188             | 261                      | 161              | 546                  | 200             | 182                  | 482                          | 370                   | 306     |
| Valine                        | 213               | 68              | 92              | 197            | 103                  | 186                 | 115             | 95                       | 112              | 171                  | 107             | 94                   | 1135                         | 1231                  | 280     |
| 3-OH-but                      | 96                | 304             | 210             | 169            | 253                  | 166                 | 365             | 444                      | 343              | 237                  | 91              | 214                  | 484                          | 484                   | 276     |
| NAD                           | 502               | 255             | 148             | 122            | 102                  | 248                 | 134             | 50                       | 134              | 185                  | 224             | 213                  | 319                          | 248                   | 206     |
| Histidine                     | 124               | 97              | 90              | 111            | 144                  | 498                 | 212             | 431                      | 137              | 308                  | 85              | 105                  | 189                          | 98                    | 188     |
| Gl-Ph-Choline                 | 53                | 302             | 389             | 20             | 234                  | 242                 | 273             | 140                      | 396              | 138                  | 0               | 239                  | 141                          | 41                    | 186     |
| Tyrosine                      | 196               | 204             | 200             | 178            | 132                  | 125                 | 229             | 175                      | 208              | 167                  | 142             | 167                  | 263                          | 97                    | 177     |
| Formate                       | 75                | 236             | 83              | 325            | 125                  | 322                 | 218             | 177                      | 68               | 129                  | 84              | 233                  | 153                          | 100                   | 166     |
| GTP                           | 118               | 0               | 269             | 0              | 145                  | 221                 | 259             | 112                      | 0                | 211                  | 190             | 267                  | 316                          | 202                   | 165     |
| NADH                          | 1236              | 48              | 17              | 86             | 8                    | 563                 | 13              | 8                        | 28               | 16                   | 3               | 0                    | 0                            | 9                     | 145     |
| Aspartate                     | 0                 | 141             | 210             | 178            | 128                  | 215                 | 156             | 93                       | 219              | 127                  | 44              | 243                  | 100                          | 89                    | 139     |
| Lysine                        | 135               | 67              | 62              | 299            | 0                    | 912                 | 0               | 0                        | 65               | 0                    | 12              | 77                   | 161                          | 88                    | 134     |
| Phenylalanine                 | 184               | 101             | 50              | 74             | 39                   | 53                  | 24              | 49                       | 67               | 44                   | 41              | 48                   | 509                          | 578                   | 133     |
| scyllo -Inositol              | 50                | 34              | 45              | 51             | 70                   | 749                 | 51              | 39                       | 44               | 49                   | 55              | 54                   | 206                          | 171                   | 119     |
| Hypoxanthine                  | 252               | 94              | 50              | 81             | 51                   | 125                 | 84              | 53                       | 66               | 137                  | 185             | 73                   | 125                          | 243                   | 116     |
| alpha -Aminobut               | 63                | 56              | 90              | 131            | 72                   | 224                 | 97              | 91                       | 84               | 118                  | 20              | 53                   | 192                          | 90                    | 99      |
| Asparagine                    | 170               | 135             | 118             | 195            | 0                    | 37                  | 0               | 0                        | 148              | 0                    | 0               | 54                   | 258                          | 113                   | 88      |
| Isoleucine                    | 82                | 34              | 34              | 73             | 24                   | 78                  | 22              | 29                       | 42               | 46                   | 36              | 40                   | 242                          | 315                   | 78      |
| D139 <sup>c</sup>             | 0                 | 0               | 0               | 0              | 0                    | 1085                | 0               | 0                        | 0                | 0                    | 0               | 0                    | 0                            | 0                     | 78      |
| Glycerol                      | 219               | 120             | 99              | 258            | 0                    | 240                 | 0               | 0                        | 71               | 0                    | 0               | 70                   | 0                            | 0                     | 77      |
| Carnosine                     | 0                 | 60              | 41              | 547            | 0                    | 0                   | 0               | 0                        | 60               | 0                    | 0               | 98                   | 117                          | 27                    | 68      |
| D121 <sup>c</sup>             | 0                 | 0               | 0               | 0              | 0                    | 947                 | 0               | 0                        | 0                | 0                    | 0               | 0                    | 0                            | 0                     | 68      |
| AMP                           | 60                | 28              | 11              | 31             | 12                   | 51                  | 60              | 10                       | 10               | 284                  | 48              | 39                   | 0                            | 228                   | 62      |
| NAA                           | 0                 | 0               | 0               | 0              | 0                    | 0                   | 0               | 0                        | 0                | 0                    | 0               | 0                    | 274                          | 501                   | 55      |
| S823 <sup>c</sup>             | 102               | 0               | 0               | 0              | 0                    | 666                 | 0               | 0                        | 0                | 0                    | 0               | 0                    | 0                            | 0                     | 55      |
| Carnitine                     | 43                | 39              | 100             | 51             | 0                    | 52                  | 0               | 0                        | 40               | 0                    | 27              | 57                   | 144                          | 112                   | 48      |
| 3-OH-isovalerate              | 0                 | 34              | 22              | 66             | 48                   | 51                  | 51              | 10                       | 24               | 44                   | 192             | 47                   | 45                           | 21                    | 47      |
| Tryptophan                    | 71                | 95              | 31              | 65             | 0                    | 0                   | 0               | 0                        | 37               | 0                    | 0               | 0                    | 161                          | 128                   | 42      |
| Choline                       | 54                | 11              | 19              | 78             | 13                   | 85                  | 20              | 32                       | 9                | 34                   | 18              | 22                   | 41                           | 69                    | 36      |
| 2,3-Butanediol                | 91                | 56              | 31              | 21             | 19                   | 0                   | 11              | 11                       | 10               | 132                  | 78              | 0                    | 0                            | 0                     | 33      |
| Inosine                       | 89                | 17              | 27              | 24             | 34                   | 52                  | 42              | 29                       | 18               | 66                   | 8               | 44                   | 0                            | 0                     | 32      |
| T727 <sup>c</sup>             | 0                 | 0               | 0               | 0              | 0                    | 399                 | 0               | 0                        | 0                | 0                    | 0               | 36                   | 0                            | 0                     | 31      |
| Fumarate                      | 13                | 23              | 19              | 36             | 29                   | 24                  | 32              | 10                       | 18               | 24                   | 25              | 14                   | 27                           | 26                    | 23      |
| NADPH <sup>c</sup>            | 0                 | 0               | 0               | 0              | 0                    | 302                 | 0               | 0                        | 0                | 0                    | 0               | 0                    | 0                            | 0                     | 22      |
| N-Me-His <sup>c</sup>         | 0                 | 0               | 0               | 0              | 0                    | 0                   | 0               | 0                        | 0                | 0                    | 0               | 0                    | 198                          | 80                    | 20      |
| Sarcosine <sup>c</sup>        | 7                 | 4               | 8               | 15             | 8                    | 22                  | 6               | 7                        | 8                | 18                   | 7               | 10                   | 35                           | 30                    | 13      |
| alpha -OH-isobut <sup>c</sup> | 0                 | 11              | 11              | 14             | 0                    | 0                   | 0               | 0                        | 12               | 0                    | 0               | 0                    | 60                           | 61                    | 12      |
| Pyruvate                      | 7                 | 9               | 16              | 12             | 9                    | 11                  | 16              | 7                        | 11               | 15                   | 13              | 7                    | 9                            | 14                    | 11      |
| Inosinate                     | 26                | 0               | 0               | 0              | 0                    | 0                   | 0               | 0                        | 0                | 42                   | 15              | 0                    | 11                           | 58                    | 11      |
| 2-OH-but                      | 28                | 18              | 16              | 14             | 0                    | 0                   | 0               | 0                        | 16               | 0                    | 0               | 0                    | 40                           | 13                    | 10      |
| N,N-DMG <sup>c</sup>          | 30                | 0               | 0               | 0              | 0                    | 39                  | 0               | 0                        | 0                | 0                    | 0               | 72                   | 0                            | 0                     | 10      |
| Isobutyrate                   | 8                 | 7               | 5               | 15             | 9                    | 10                  | 10              | 7                        | 8                | 16                   | 2               | 4                    | 19                           | 11                    | 9       |
| S120 <sup>c</sup>             | 0                 | 0               | 0               | 0              | 0                    | 0                   | 0               | 126                      | 0                | 0                    | 0               | 0                    | 0                            | 0                     | 9       |
| Acetylcarnitine               | 60                | 0               | 0               | 0              | 0                    | 0                   | 0               | 0                        | 0                | 0                    | 0               | 0                    | 19                           | 22                    | 7       |
| 3-Me-His <sup>c</sup>         | 0                 | 0               | 0               | 0              | 0                    | 100                 | 0               | 0                        | 0                | 0                    | 0               | 0                    | 0                            | 0                     | 7       |
| S109 <sup>c</sup>             | 0                 | 0               | 0               | 0              | 0                    | 0                   | 0               | 0                        | 0                | 0                    | 95              | 0                    | 0                            | 0                     | 7       |
| S112 <sup>c</sup>             | 0                 | 0               | 0               | 0              | 0                    | 0                   | 0               | 81                       | 0                | 0                    | 0               | 0                    | 0                            | 0                     | 6       |
| 2-OH-3-Me-but <sup>c</sup>    | 18                | 0               | 0               | 0              | 0                    | 0                   | 0               | 0                        | 0                | 0                    | 0               | 0                    | 31                           | 18                    | 5       |
| 2-Ketoisovalerate             | 0                 | 0               | 0               | 0              | 0                    | 0                   | 0               | 0                        | 0                | 0                    | 0               | 0                    | 21                           | 9                     | 2       |

<sup>a</sup> Lens from only one individual was analyzed

<sup>b</sup> **abbreviations:** 2-OH-3-Me-but – 2-hydroxy-3-methyl-butyrate; 2-OH-but – 2-hydroxy-butyrate; 3-Me-His – 3-methylhistidine; 3-OH-but – 3-hydroxy-butyrate; 3-OH-isovalerate – 3-hydroxy-isovalerate; ADP – adenosine diphosphate; alpha-Aminobut – alpha-aminobutyrate; alpha-OH-isobut – alpha-hydroxy-isobutyrate; AMP – adenosine monophosphate; ATP – adenosine triphosphate; Gl-Ph-Choline – glycerophosphocholine; GSSG – glutathione oxidized; GTP – guanosine triphosphate; N,N-DMG – N,N-dimethylglycine; NAA – N-acetyl-aspartate; NAD – nicotinamide adenine dinucleotide; NADH – nicotinamide adenine dinucleotide reduced; NADPH – nicotinamide adenine dinucleotide phosphate reduced; N-Me-His – N-methylhistidine; Ph-Choline – phosphocholine; UDP – uridine diphosphate

<sup>c</sup> Low metabolite identification confidence, not confirmed by chemical standards. Concentrations of unknowns were estimated assuming that the signals in the aliphatic part of NMR spectra (S109, S112, S120, D121, and D139) correspond to a single CH<sub>3</sub> group, while the aromatic signals (T727 and S823) correspond to CH group.
